# Supplementary material
Source: Royal Society of Chemistry journal article supplement (doi:10.1039/d6nj00830e)
Supplement: d6nj00830e1.pdf [file d6nj00830e1.pdf]

Supporting materials

## **Mechanistic Insights into the Phase-Directed Green Synthesis of Antibacterial Copper Nanoparticles in Ethaline Deep Eutectic Solvent**

Wen Shi,<sup>a</sup> Keshu Song,<sup>a</sup> Shaohua Wang,<sup>a</sup> Zhigang Xu,<sup>b</sup> Xuejiao Zhou,<sup>a</sup> Juan An,<sup>a</sup> Xiaoyan Xiang,<sup>a</sup> Wentang Xia,<sup>a</sup> Wenqiang Yang,<sup>a,b,1</sup>

*a School of Metallurgy and Power Engineering, Chongqing University of Science and Technology, Chongqing 401331, P.R. China*

*b Kopperchem industry Corp., LTD, Solvent Extraction Engineering Research Center, Chongqing 401221, P.R. China*

---

<sup>1</sup> Corresponding author. Tel: +86-023-65023711; Fax: +86-023-65023711.  
E-mail address: [wenqiangyang@cqust.edu.cn](mailto:wenqiangyang@cqust.edu.cn) (Wenqiang Yang)

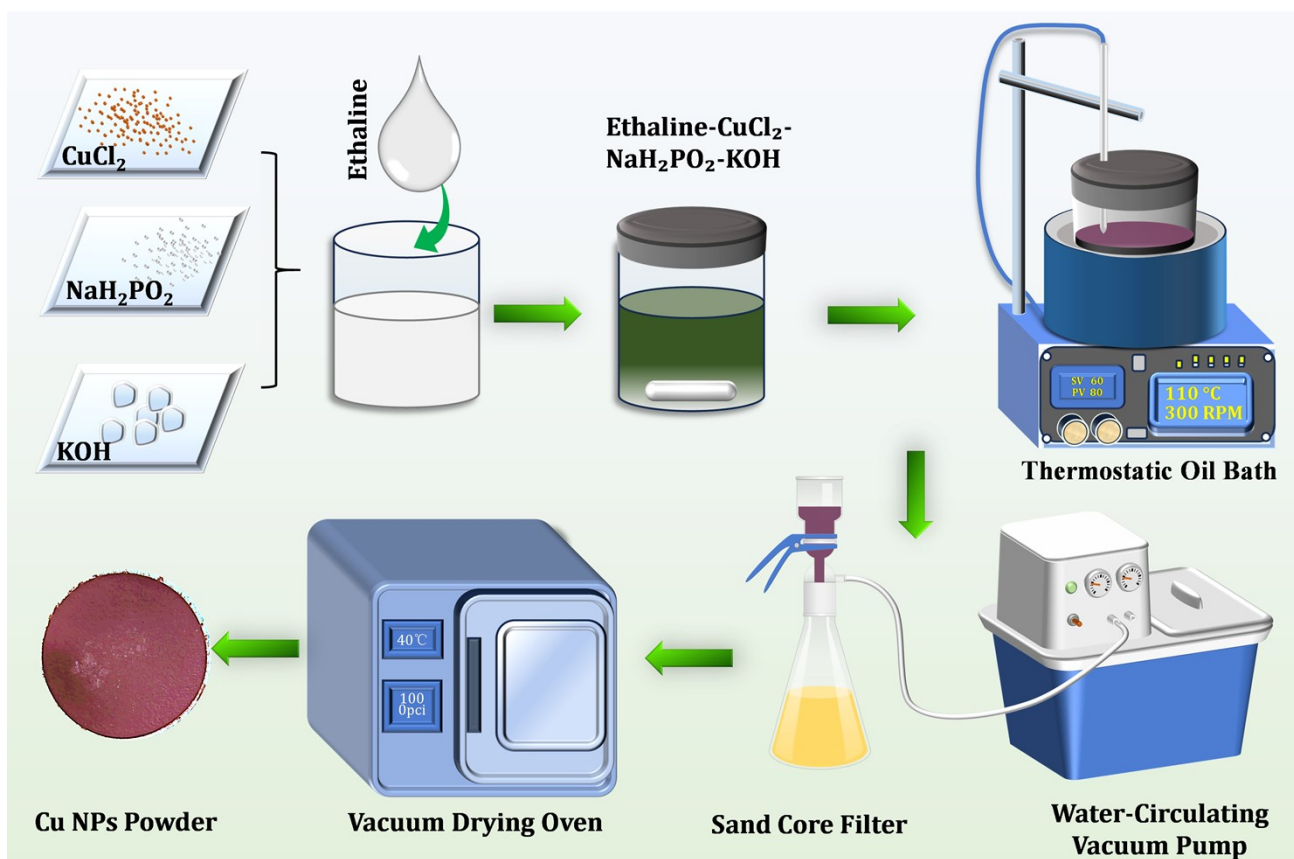

**Figure S1.** Flowchart of the one-step synthesis of copper nanoparticles in Ethaline deep eutectic solvent.

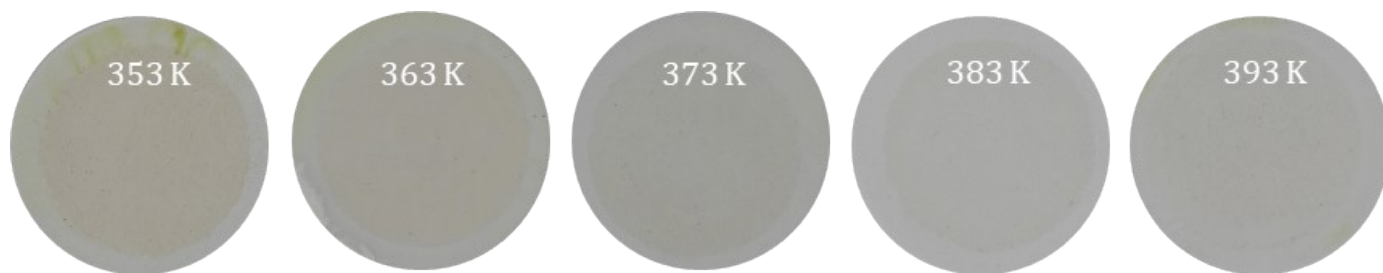

**Figure S2.** Photographs of the filter membranes after filtration of the single-solute 0.08 M  $\text{CuCl}_2$ -Ethaline system reacted at different temperatures (353–393 K) for 6 h.

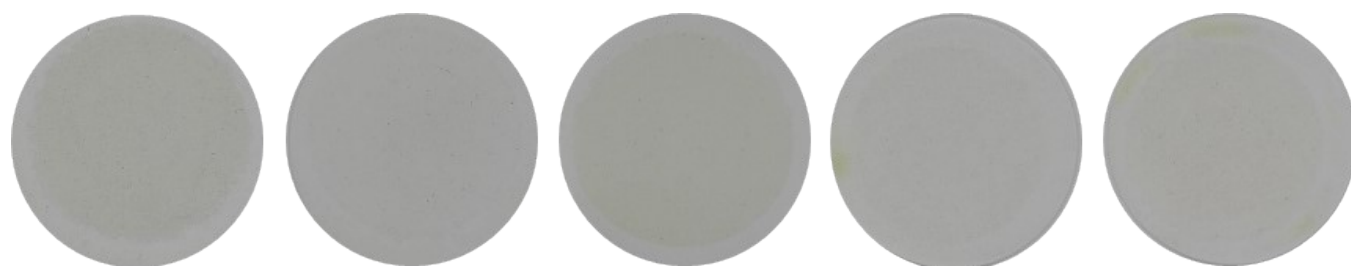

**Figure S3.** Photographs of the filter membranes after filtration of the binary-solute 0.08 M  $\text{CuCl}_2$ -0.16 M  $\text{NaH}_2\text{PO}_2$ -Ethaline system reacted at different temperatures (353–393 K) for 6 h.

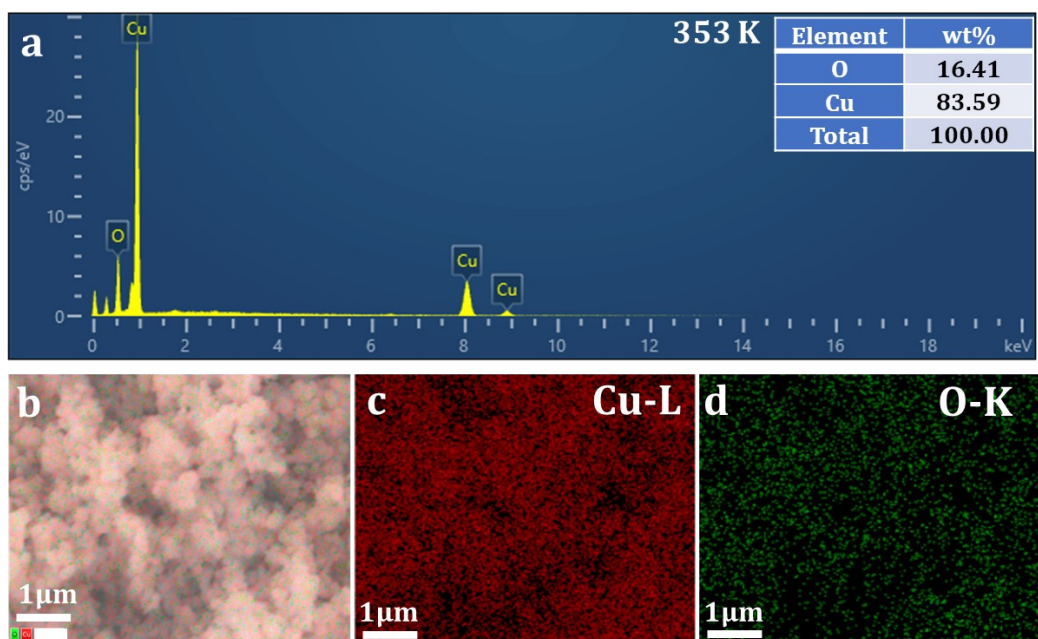

**Figure S4.** (a) EDS spectrum and (b-d) corresponding elemental distribution maps of the product synthesized in the ternary Ethaline system (0.16 M  $\text{NaH}_2\text{PO}_2$ , 0.24 M KOH, and 0.08 M  $\text{CuCl}_2$ ) at 353 K for 6 h.

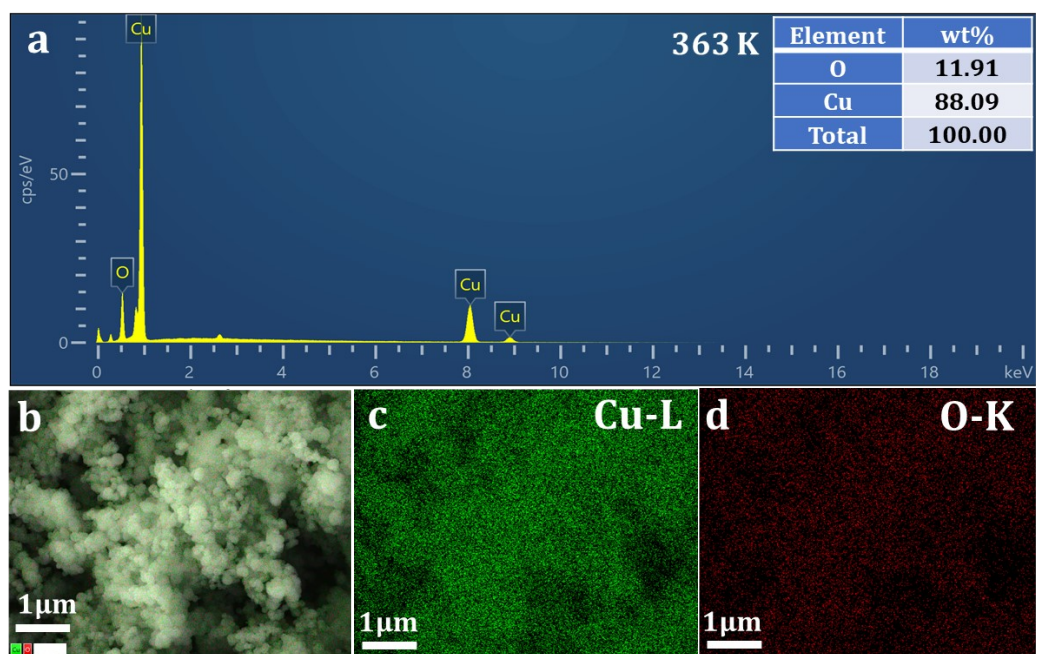

**Figure S5.** (a) EDS spectrum and (b-d) corresponding elemental distribution maps of the product synthesized in the ternary Ethaline system (0.16 M  $\text{NaH}_2\text{PO}_2$ , 0.24 M KOH, and 0.08 M  $\text{CuCl}_2$ ) at 363 K for 6 h.

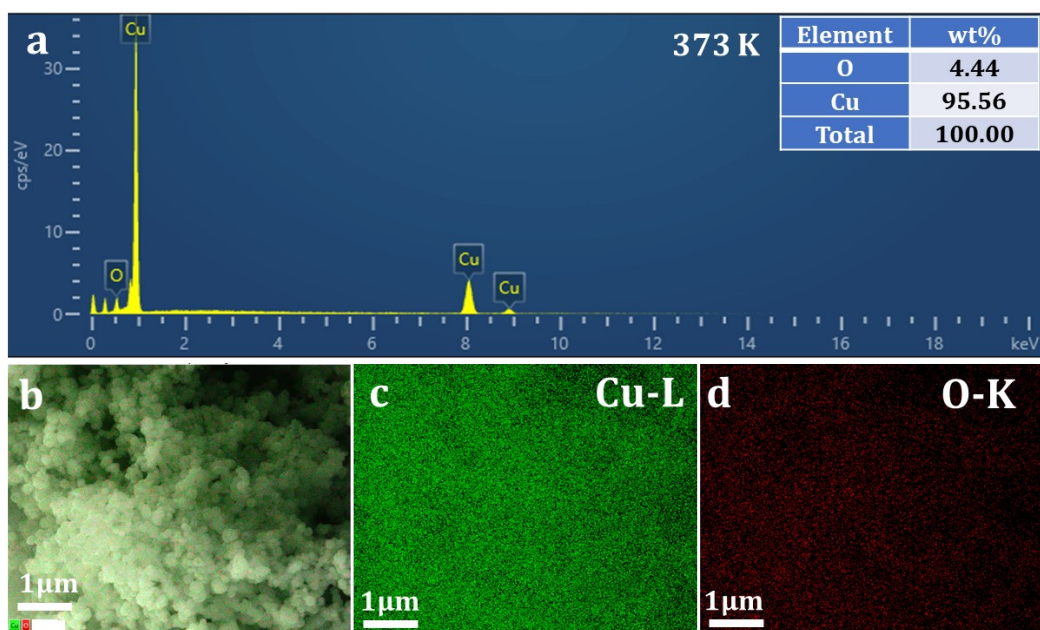

**Figure S6.** (a) EDS spectrum and (b-d) corresponding elemental distribution maps of the product synthesized in the ternary Ethaline system (0.16 M  $\text{NaH}_2\text{PO}_2$ , 0.24 M KOH, and 0.08 M  $\text{CuCl}_2$ ) at 373 K for 6 h.

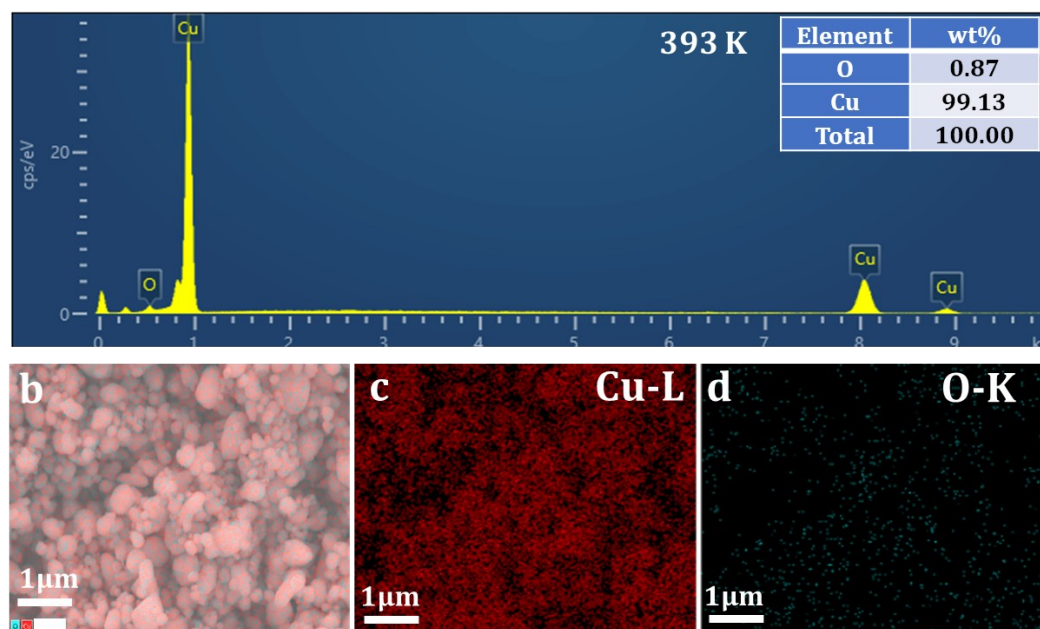

**Figure S7.** (a) EDS spectrum and (b-d) corresponding elemental distribution maps of the product synthesized in the ternary Ethaline system (0.16 M  $\text{NaH}_2\text{PO}_2$ , 0.24 M KOH, and 0.08 M  $\text{CuCl}_2$ ) at 393 K for 6 h.

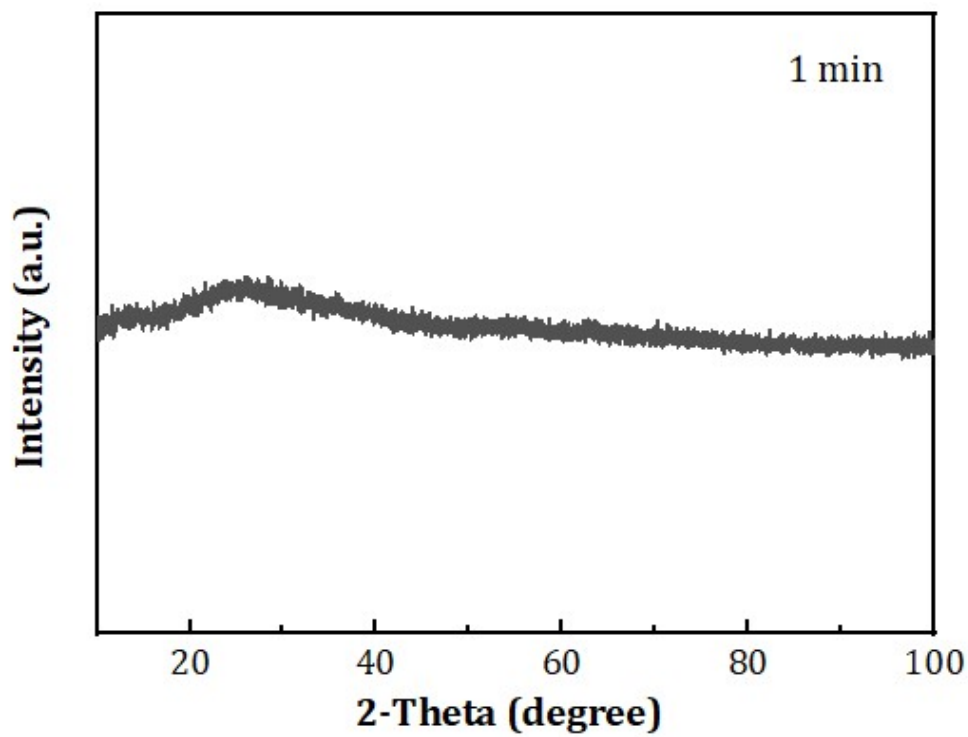

Figure S8. XRD pattern of P-1min.

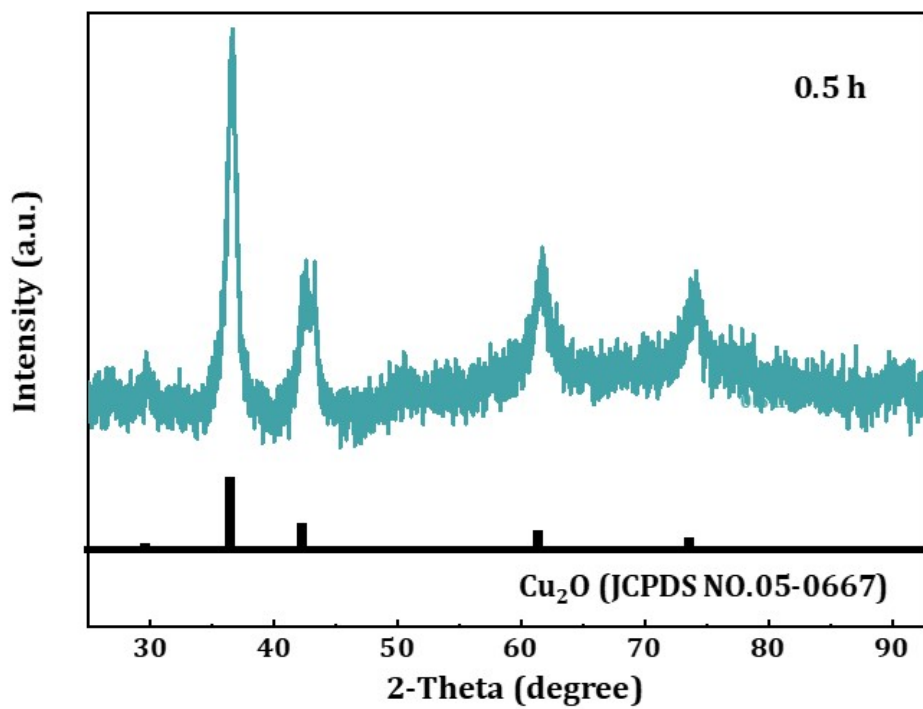

Figure S9. XRD pattern of P-0.5 h sample.

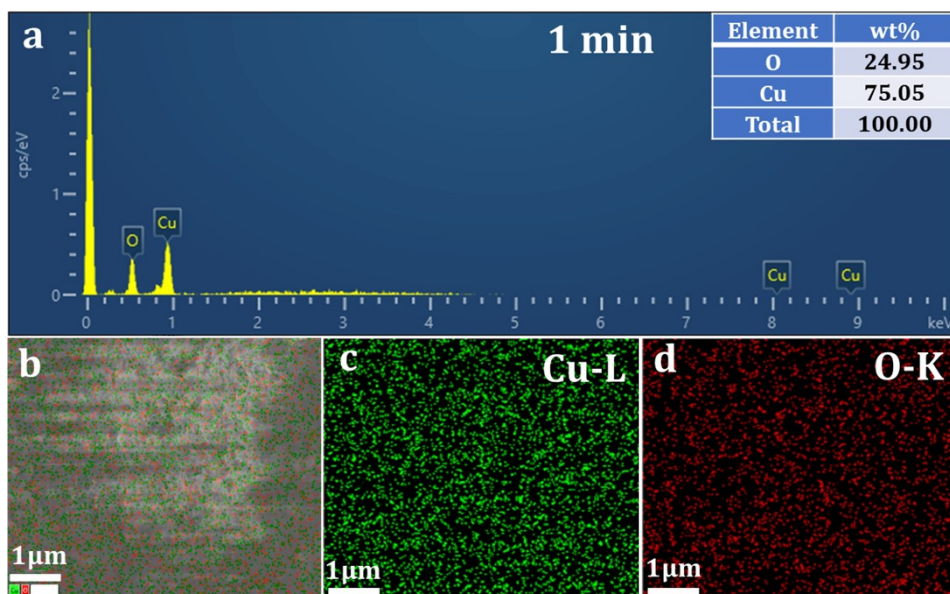

**Figure S10.** (a) EDS spectrum and (b-d) corresponding elemental distribution maps of P-1min sample.

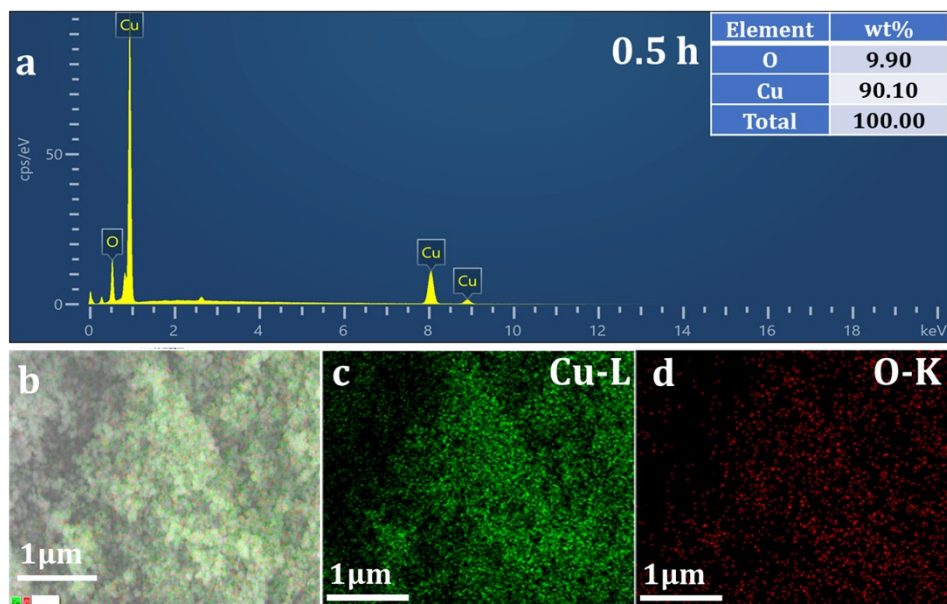

**Figure S11.** (a) EDS spectrum and (b-d) corresponding elemental distribution maps of P-0.5h sample.

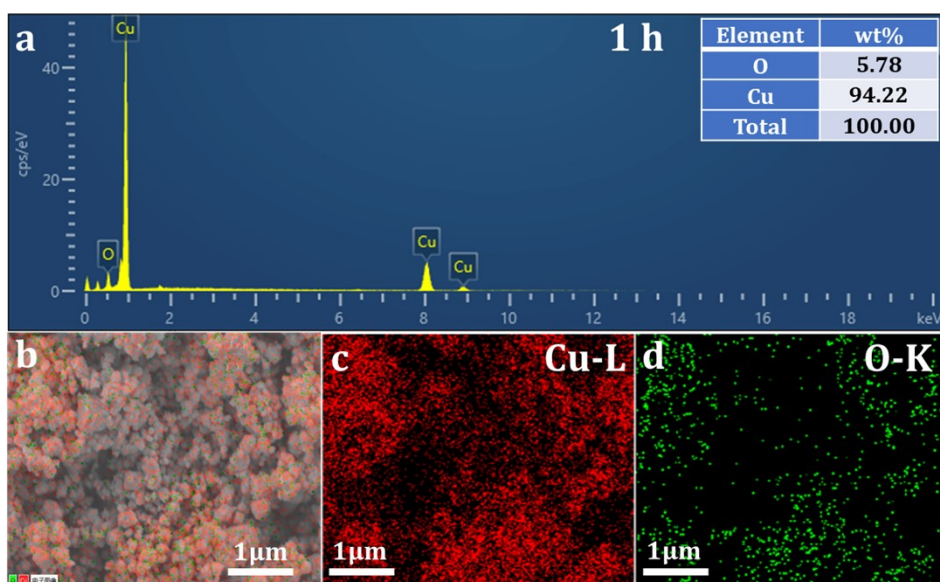

**Figure S12.** (a) EDS spectrum and (b-d) corresponding elemental distribution maps of P-1h sample.

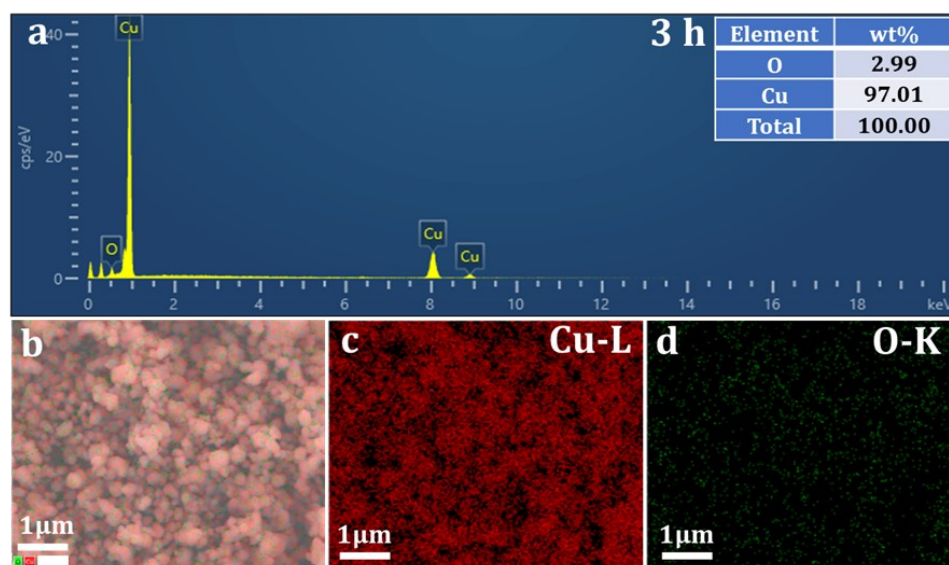

**Figure S13.** (a) EDS spectrum and (b-d) corresponding elemental distribution maps of P-3h sample.

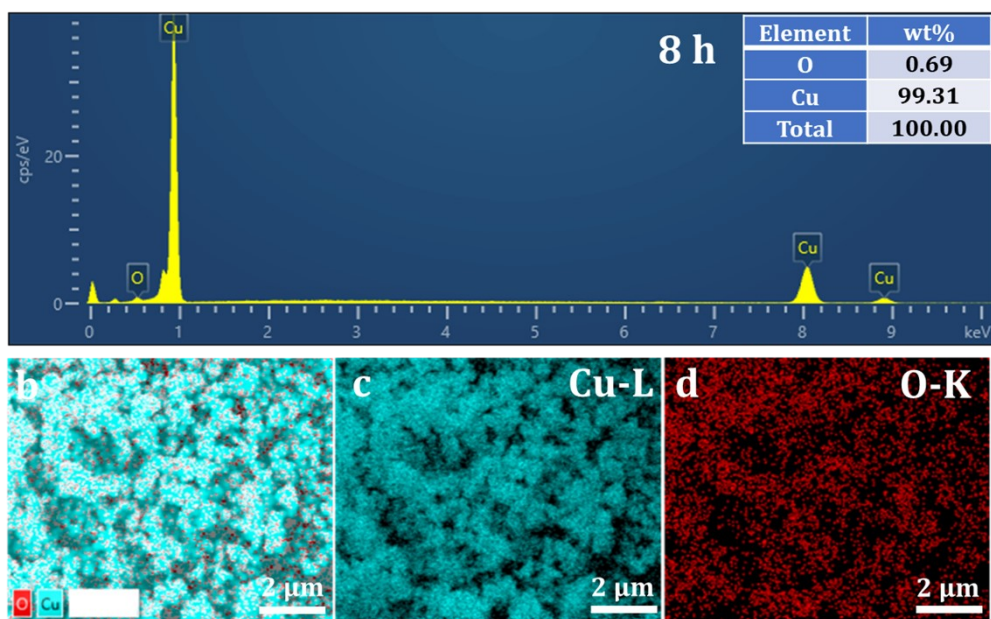

**Figure S14.** (a) EDS spectrum and (b-d) corresponding elemental distribution maps of P-8h sample.

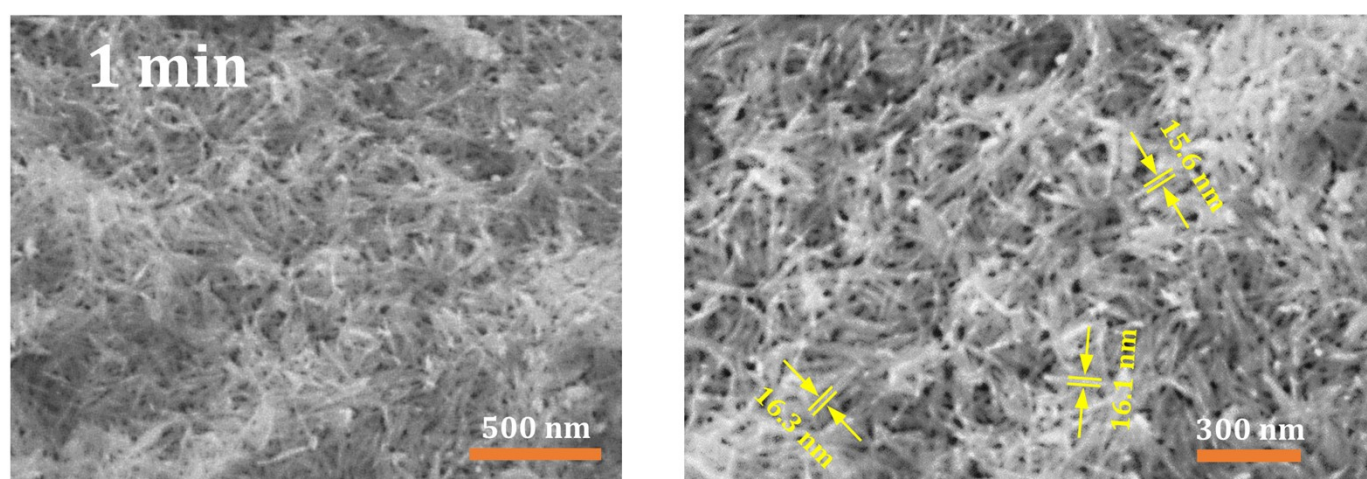

**Figure S15.** Low- and high-magnification FESEM images of P-1min.

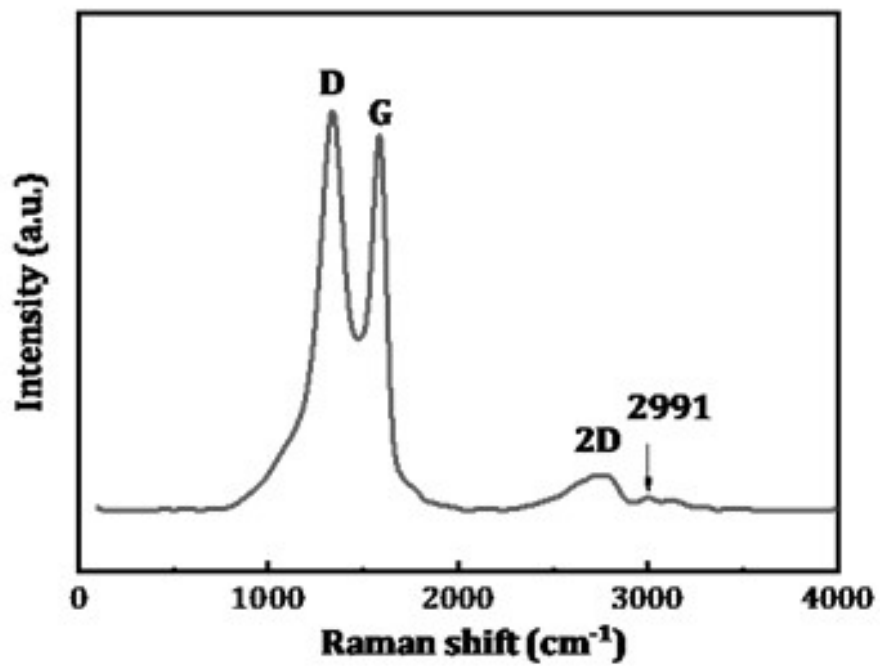

Figure S16. Raman spectrum of the P-1min sample.

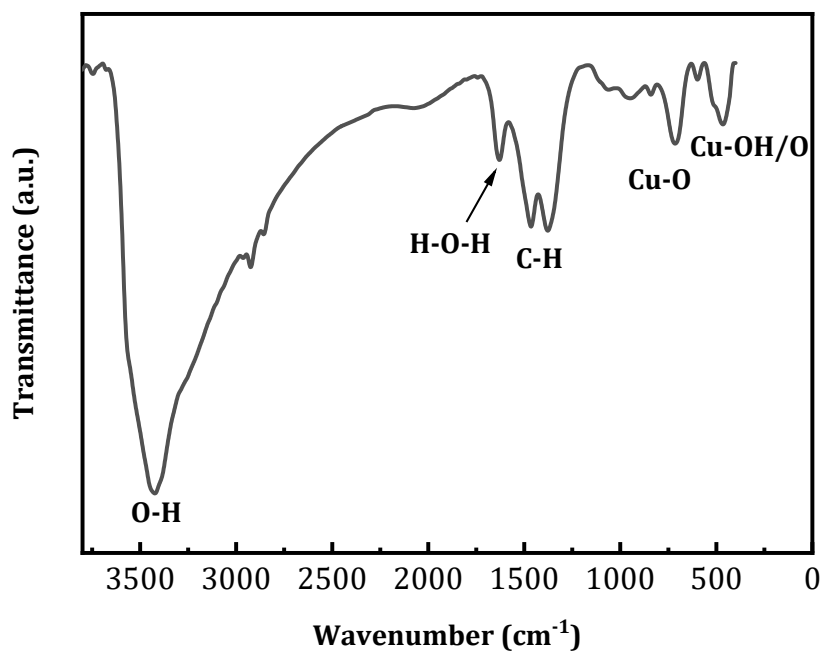

Figure S17. FTIR spectrum of the P-1min sample.

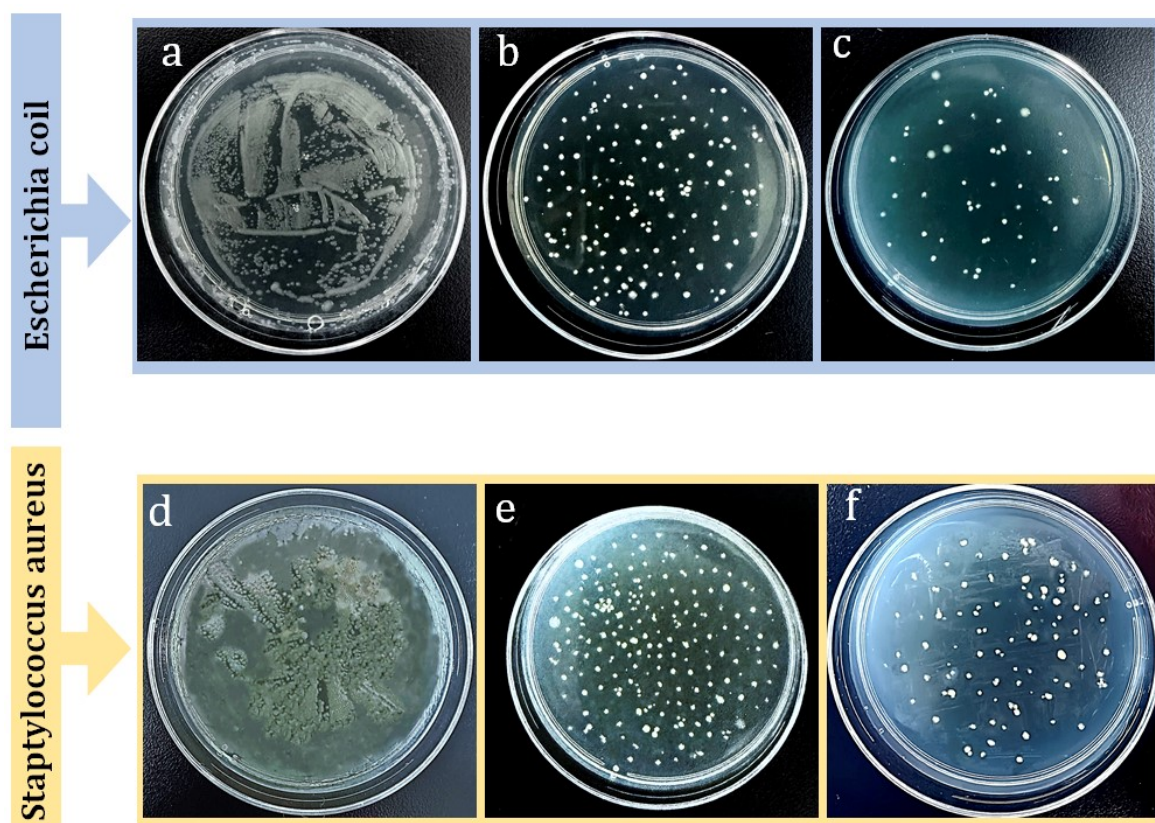

**Figure S18.** Concentration-dependent antibacterial activity of Cu/E6 NPs against *E. coli* and *S. aureus* after 12 h treatment: (a-c) *E. coli* treated with 0.05, 0.10, and 0.25 g L<sup>-1</sup> Cu/E6 NPs, respectively; (d-f) *S. aureus* treated with 0.05, 0.10, and 0.25 g L<sup>-1</sup> Cu/E6 NPs, respectively.

Figure S18 shows the concentration-dependent antibacterial activity of Cu/E6 NPs against Gram-negative bacterium *E. coli* and Gram-positive bacterium *S. aureus* at 0.05, 0.10, and 0.25 g L<sup>-1</sup> after 12 h treatment. For *E. coli*, only weak antibacterial activity was observed at 0.05 g L<sup>-1</sup> (Fig. S18a). When the concentration increased to 0.10 and 0.25 g L<sup>-1</sup>, the number of viable colonies decreased markedly, with inhibition rates of 46.7% and 86.3%, respectively (Fig. S18b, c). For *S. aureus*, a similar concentration-dependent trend was observed. Limited inhibition was observed at 0.05 g L<sup>-1</sup> (Fig. S18d), while the inhibition rates increased to 33.3% and 71.3% at 0.10 and 0.25 g L<sup>-1</sup>, respectively (Fig. S18e, f). These results demonstrate the dose-dependent antibacterial activity of Cu/E6 NPs against both bacterial strains. In addition, under the same sublethal concentrations, *E. coli* showed higher sensitivity to Cu/E6 NPs than *S. aureus*.

**Table S1.** ICP-MS quantification of soluble copper released from Cu/E6 NPs and commercial copper powder in agar medium after 12 h incubation.

| <b>Sample</b>        | <b>Soluble copper concentration (<math>\mu\text{g/mL}</math>)</b> |
|----------------------|-------------------------------------------------------------------|
| Cu/E6 NPs            | 10.13                                                             |
| Commercial Cu powder | 5.18                                                              |

The soluble copper species released from Cu/E6 NPs and commercial Cu powder were quantified under the same agar-medium conditions used for the antibacterial assay. After 12 h incubation, the agar medium containing the copper samples was fragmented, dispersed in 100 mL of deionized water at 25 °C, stirred at 300 rpm for 5 min, and filtered to remove residual solid particles. The filtrate was then analyzed by ICP-MS. As shown in Table S1, Cu/E6 NPs generated a higher concentration of soluble copper species than commercial Cu powder, with values of 10.13 and 5.18  $\mu\text{g/mL}$ , respectively. This result suggests that the enhanced antibacterial activity of Cu/E6 NPs may be partly associated with their greater release of soluble copper species under the tested agar-based conditions.

**Table S2.** Comparison of antibacterial performance of copper nanoparticles.

| Test samples                                 | Method of synthesis                                                                                                             | Size/shape                            | Concentration                                                  | Test Method                                                                          | Bacteria                          | Antimicrobial activity                                                                                                                                                                                  | Refs      |
|----------------------------------------------|---------------------------------------------------------------------------------------------------------------------------------|---------------------------------------|----------------------------------------------------------------|--------------------------------------------------------------------------------------|-----------------------------------|---------------------------------------------------------------------------------------------------------------------------------------------------------------------------------------------------------|-----------|
| Cu/E6 NPs                                    | One-pot chemical reduction in Ethaline DES                                                                                      | 94.6 nm/ quasi-spherical              | 50-500 µg/mL; Cu <sup>2+</sup> release: 10.13 µg/mL after 12 h | Agar dilution                                                                        | <i>S. aureus</i> ; <i>E. coli</i> | Complete inhibition against both <i>S. aureus</i> and <i>E. coli</i> after 12 h; MIC: <i>S. aureus</i> 500 µg/mL; <i>E. coli</i> 500 µg/mL                                                              | This work |
| Commercial Cu powder                         | Atomization                                                                                                                     | 0.2-0.55 µm/ spherical                | 500 µg/mL; Cu <sup>2+</sup> release: 5.18 µg/mL after 12 h     | Agar dilution                                                                        | <i>S. aureus</i> ; <i>E. coli</i> | Inhibition rates of 94.7% against <i>S. aureus</i> and 89.5% against <i>E. coli</i> after 12 h                                                                                                          | This work |
| CuNPs (Bio)                                  | Extracellular synthesis using <i>Bacillus licheniformis</i> CPJN13S supernatant                                                 | 7.7-18.4 nm/ polygonal/hexagonal      | 100 µg/mL                                                      | Growth curve analysis (OD600)                                                        | <i>S. aureus</i>                  | Maximum growth inhibition of 43% at 27 h                                                                                                                                                                | [1]       |
| Cu NPs                                       | Chemical reduction                                                                                                              | ~5.3 nm/ quasi-spherical              | 32 µg/mL                                                       | CFU counting after 2 h contact                                                       | <i>S. aureus</i> ; <i>E. coli</i> | <i>E. coli</i> : 99.9% reduction at ≥8 µg/mL; <i>S. aureus</i> : 86.3-98.0%                                                                                                                             | [2]       |
| PDA-Cu NPs / PDA-Cu@PgelMA gradient hydrogel | PDA-Cu NPs synthesized by dopamine polymerization with Cu <sup>2+</sup> ; incorporated into GelMA hydrogel by UV polymerization | ~150 nm/ spherical                    | 100 µg/mL                                                      | Agar plate/CFU counting for planktonic bacteria; crystal violet staining for biofilm | <i>S. aureus</i> ; <i>E. coli</i> | PDA-Cu NPs: >94% killing of <i>S. aureus</i> and >92% killing of <i>E. coli</i> after 1 h. Gradient hydrogel: ~45% inhibition of <i>S. aureus</i> biofilm and ~53% inhibition of <i>E. coli</i> biofilm | [3]       |
| <i>F. vulgaris</i> -CuNPs                    | Green synthesis using <i>Falcaria vulgaris</i> leaf extract                                                                     | 20-25 nm/ nearly spherical            | 2000-8000 µg/mL                                                | Broth dilution; agar well/disk diffusion                                             | <i>S. aureus</i> ; <i>E. coli</i> | Inhibited <i>S. aureus</i> at 4000 µg/mL and <i>E. coli</i> at 8000 µg/mL                                                                                                                               | [4]       |
| Cu <sup>0</sup> NPs                          | Chemical reduction                                                                                                              | 2-47 nm/ Quasi-spherical              | 100 µg/mL                                                      | Broth microdilution (CLSI); colony counting for planktonic bacteria                  | <i>S. aureus</i> ; <i>E. coli</i> | 99.85% inhibition ( <i>S. aureus</i> ), 99.94% ( <i>E. coli</i> )                                                                                                                                       | [5]       |
| CuNPs                                        | Biogenic synthesis using green alga <i>Botryococcus braunii</i> extract                                                         | 10-70 nm/ cubical/spherical/elongated | 100-250 µg/mL                                                  | Agar well diffusion; broth dilution assay                                            | <i>S. aureus</i> ; <i>E. coli</i> | MIC: 250 µg/mL for <i>E. coli</i> and <i>S. aureus</i>                                                                                                                                                  | [6]       |

|                                                 |                                                               |                                                                    |                 |                                                   |                                     |                                                                                                                                                                                             |      |
|-------------------------------------------------|---------------------------------------------------------------|--------------------------------------------------------------------|-----------------|---------------------------------------------------|-------------------------------------|---------------------------------------------------------------------------------------------------------------------------------------------------------------------------------------------|------|
| CuNPs from Geranium extract                     | Green synthesis using Geranium extract                        | ~5–8 nm/ mostly spherical                                          | 150-300 µg/mL   | Nutrient agar plate inhibition test/MIC assay     | <i>E. coli</i>                      | Complete inhibition of <i>E. coli</i> at 150 µg/mL                                                                                                                                          | [7]  |
| CuNPs from Opuntia ficus-indica extract         | Green synthesis using Opuntia ficus-indica extract            | ~5–10 nm/ mostly spherical                                         |                 |                                                   |                                     | Complete inhibition of <i>E. coli</i> at 350 µg/mL                                                                                                                                          |      |
| CuNPs@Tinospora cardifolia-coated cotton fabric | Green synthesis using Tinospora cardifolia leaf extract; one- | 63.3 nm/ spherical                                                 | 175-300 µg/mL   | Turbidimetric assay; cup plate                    | <i>S. aureus; E. coli</i>           | 101% against <i>S. aureus</i> at 175 µg/mL; 74% against <i>E. coli</i> at 300 µg/mL                                                                                                         | [8]  |
| Cu NPs                                          | Thermal decomposition                                         | 4-18 nm/ spherical                                                 | 200-3200 µg/mL  | Broth dilution/OD600 inhibition assay; agar plate | <i>S. aureus</i>                    | 99% at 1600 µg/mL; 99.6% at 3200 µg/mL                                                                                                                                                      | [9]  |
| CuNP-WS1                                        | Cu nanoparticles fixed on cellulosic walnut shell material    | 15-22 nm/ Cu nanoparticles fixed on cellulosic walnut shell        | 62.5-4000 µg/mL | Broth macro-dilution                              | <i>S. aureus; E. coli</i>           | MIC: ≥1000 µg/mL                                                                                                                                                                            | [10] |
| CuNP-WS2                                        | Cu nanoparticles fixed on cellulosic walnut shell material    | 60-80nm/ Cu nanoparticles fixed on cellulosic walnut shell         | 62.5-4000 µg/mL | Broth macro-dilution                              | <i>S. aureus; E. coli</i>           | MIC: <i>S. aureus</i> 250 µg/mL; <i>E. coli</i> 500 µg/mL                                                                                                                                   | [10] |
| CuNP-WS3                                        | Cu nanoparticles fixed on cellulosic walnut shell material    | Aggregated metallic nanoparticles fixed on cellulosic walnut shell | 62.5-4000 µg/mL | Broth macro-dilution                              | <i>S. aureus; E. coli</i>           | MIC: <i>S. aureus</i> 125 µg/mL; <i>E. coli</i> 250 µg/mL                                                                                                                                   | [10] |
| Cu-NPs                                          | Green synthesis using pink rose petal extract                 | ~200 nm/ spherical                                                 | 4-2048 µg/mL    | MIC assay; well diffusion method                  | <i>E. coli (standard &amp; MDR)</i> | 64 µg/mL against standard <i>E. coli</i> ; 1024 µg/mL against MDR <i>E. coli</i>                                                                                                            | [11] |
| CCM-450                                         | Spray drying + calcination (450°C)                            | 1-5 µm/Cu particles on porous carbon microspheres                  | 62.5-500 µg/mL  | Broth dilution method; plate counting method      | <i>S. aureus; E. coli</i>           | MIC: 125-500 µg/mL for <i>E. coli</i> , 62.5-250 µg/mL for <i>S. aureus</i> . For CCM-450(5:1), inhibition rate: 97% against <i>E. coli</i> , 99.6% against <i>S. aureus</i> (24 h contact) | [12] |

## References:

- [1] S. Rani, S. Dhankher, P. Kumar, P. Dahiya, K. Arora, A.S. Dang, P.J.F.i.N. Suneja, Biosynthesis, optimization, and characterization of CuNPs using *Bacillus licheniformis* CPJN13S and their antibacterial activity, 7 (2025) 1663115.
- [2] U. Bogdanović, V. Lazić, V. Vodnik, M. Budimir, Z. Marković, S.J.M.I. Dimitrijević, Copper nanoparticles with high antimicrobial activity, 128 (2014) 75-78.
- [3] J. Zhu, A. Wang, X. Miao, H. Ye, S. Pan, C. Zhang, Q. Qian, F.J.R.a. Su, Harnessing gradient gelatin nanocomposite hydrogels: a progressive approach to tackling antibacterial biofilms, 13 (2023) 30453-30461.
- [4] M.M. Zangeneh, H. Ghaneialvar, M. Akbaribazm, M. Ghanimatdan, N. Abbasi, S. Goorani, E. Pirabbasi, A.J.J.o.P. Zangeneh, P.B. Biology, Novel synthesis of *Falcaria vulgaris* leaf extract conjugated copper nanoparticles with potent cytotoxicity, antioxidant, antifungal, antibacterial, and cutaneous wound healing activities under in vitro and in vivo condition, 197 (2019) 111556.
- [5] L. Argueta-Figueroa, I. Álvarez-Solorza, A. Moreno-Rodríguez, N. Torres-Gómez, A.R. Vilchis-Nestor, J.L. García-Rivas, R.J.D.M. Torres-Rosas, Study of antibacterial and cytotoxic properties of copper nanoparticles obtained through a novel approach, 5 (2025) 231.
- [6] A. Arya, K. Gupta, T.S. Chundawat, D.J.B.c. Vaya, applications, Biogenic synthesis of copper and silver nanoparticles using green alga *Botryococcus braunii* and its antimicrobial activity, 2018 (2018) 7879403.
- [7] J. Bocarando-Chacón, D. Vargas-Vazquez, F. Martinez-Suarez, C. Flores-Juárez, M.J.A.P.A.M.S. Cortez-Valadez, Processing, Surface-enhanced Raman scattering and antibacterial properties from copper nanoparticles obtained by green chemistry, 126 (2020) 1.
- [8] P. Sharma, S. Pant, V. Dave, K. Tak, V. Sadhu, K.R.J.J.o.m.m. Reddy, Green synthesis and characterization of copper nanoparticles by *Tinospora cardifolia* to produce nature-friendly copper nano-coated fabric and their antimicrobial evaluation, 160 (2019) 107-116.
- [9] R. Betancourt-Galindo, P. Reyes-Rodriguez, B. Puente-Urbina, C. Avila-Orta, O. Rodríguez-Fernández, G. Cadenas-Pliego, R. Lira-Saldivar, L.J.J.o.N. García-Cerda, Synthesis of copper nanoparticles by thermal decomposition and their antimicrobial properties, 2014 (2014) 980545.
- [10] T. Mehdizadeh, A. Zamani, S.M. Abtahi Froushani, Preparation of Cu nanoparticles fixed on cellulosic walnut shell material and investigation of its antibacterial, antioxidant and anticancer effects, *Heliyon*, 6 (2020).
- [11] X. Yuan, Y. Wang, The Green Synthesis of Cu Nanoparticles and Investigation of the Antibacterial Properties and Cytotoxicity on Multidrug-Resistant *E. coli*, *Curr. Top. Med. Chem.*, 26 (2025) 1004-1013
- [12] X. Cheng, A. Fu, H. Li, Y. Wang, P. Guo, J. Liu, J. Zhang, X.S.J.A.S.C. Zhao, Engineering, Sustainable preparation of copper particles decorated carbon microspheres and studies on their bactericidal activity and catalytic properties, 3 (2015) 2414-2422.
